# Supplementary material for: Revisiting the importance of dye binding mode in dye-sensitized solar cells: a periodic viewpoint
Source: Royal Society of Chemistry journal article supplement (doi:10.1039/c2jm31119d), 2012-01-01
Supplement: c2jm31119d.pdf [file c2jm31119d.pdf]

**Revisiting the importance of dye binding mode in dye-sensitized  
solar cells: a periodic viewpoint**

– **SUPPLEMENTARY MATERIAL** –

Frédéric Labat,\* Ilaria Ciofini, and Carlo Adamo

*Laboratoire d'Electrochimie, Chimie des Interfaces et Modélisation pour l'Energie,*

*UMR CNRS 7575, ENSCP – Chimie Paristech,*

*11 rue P. et M. Curie, Paris 75231 Cedex 05, France*

(Dated: December 31, 2011)

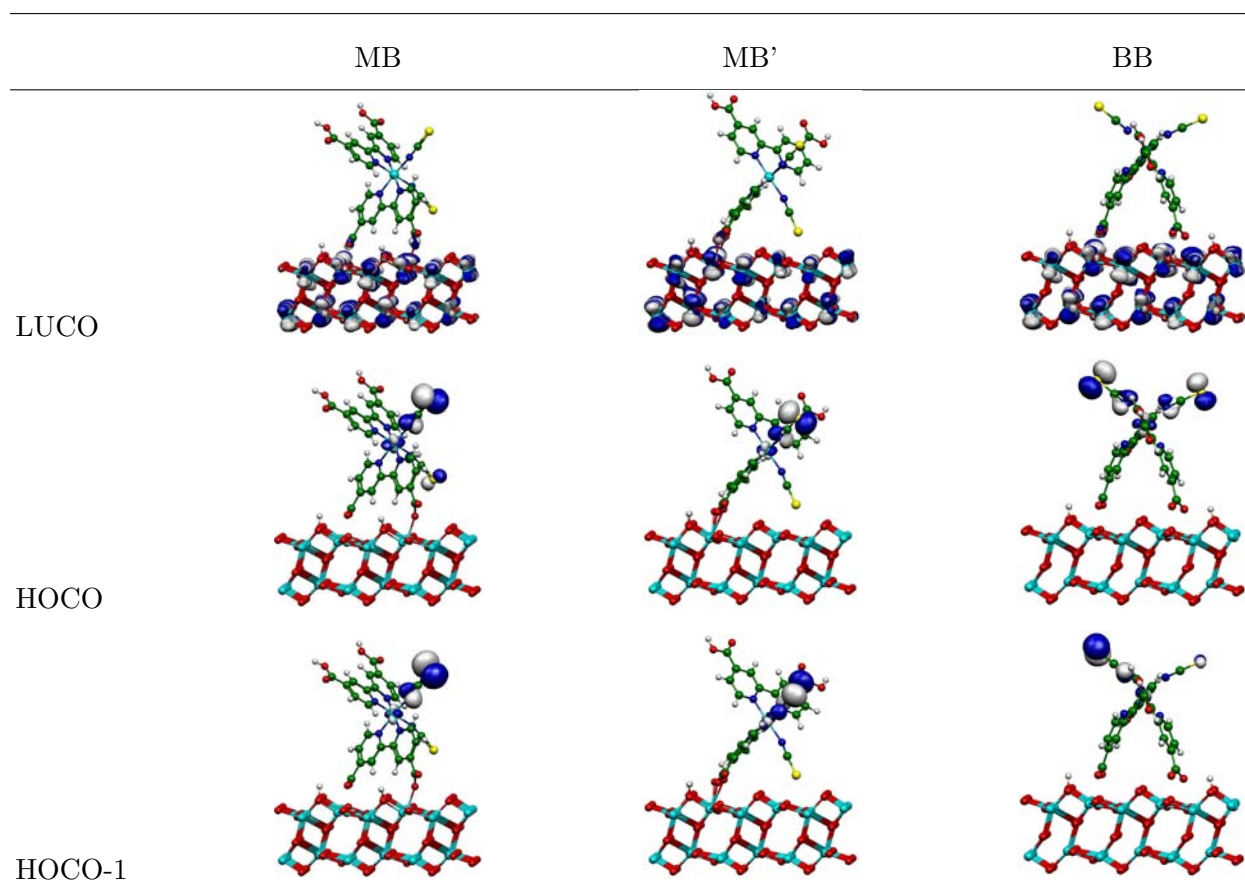

**TABLE S1:** Computed  $\Gamma$ -point frontier crystalline orbitals for all investigated adsorption modes of N3 on TiO<sub>2</sub> anatase (101). Isovalues:  $|0.040|$  and  $|0.007|$  for HOCOs and LOCO, respectively.

Fig. S1: Labat *et al.*

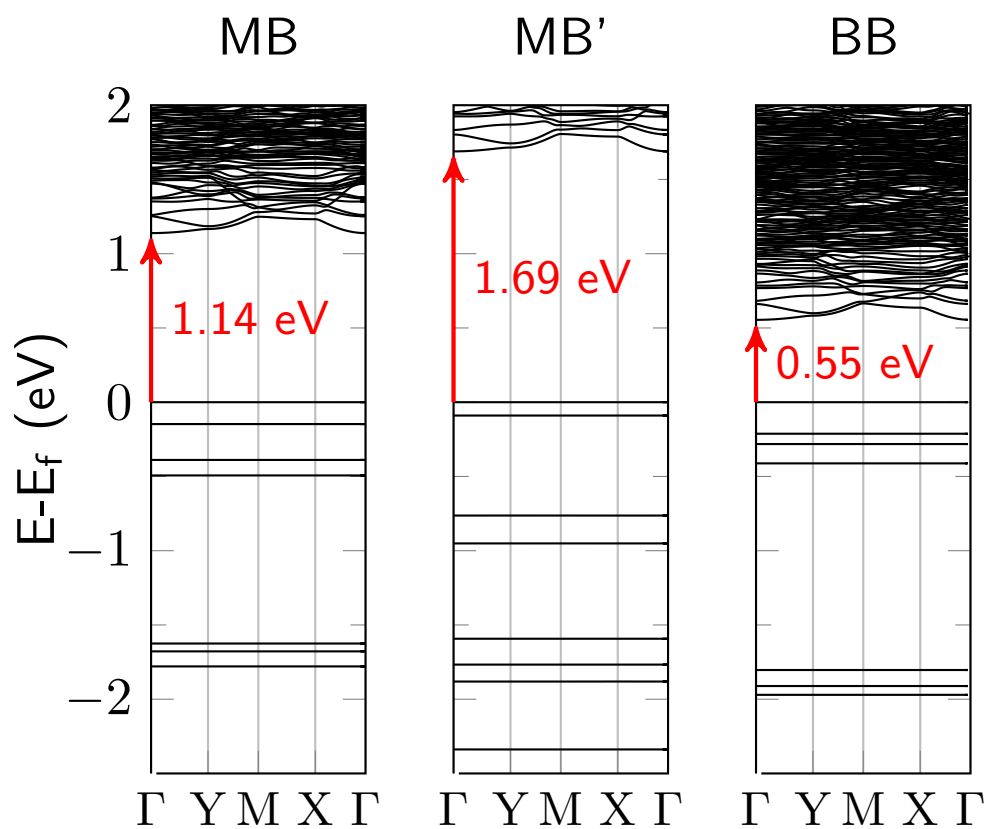

**FIG. S1:** Computed band structures of the three considered adsorption modes of N3/TiO<sub>2</sub>.

---

\* Electronic address: frederic-labat@enscp.fr
